# Supplementary material
Source: Springer Nature journal article supplement (https://www.springermedizin.de/resource/supplementary/12935_2009_240_MOESM5_ESM.pdf/9540224)

**Tumour volume (mm<sup>3</sup>)**

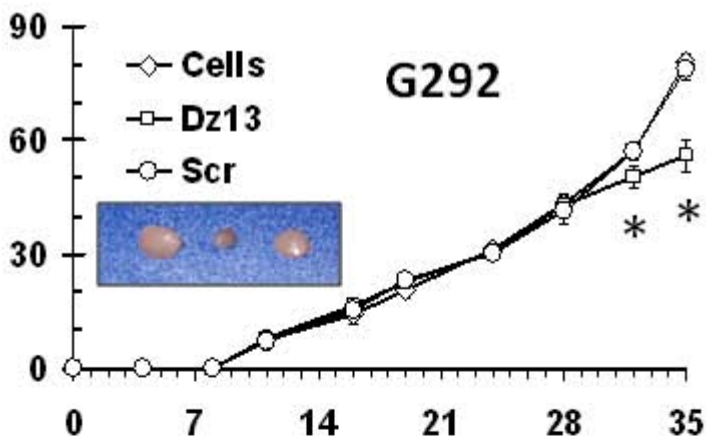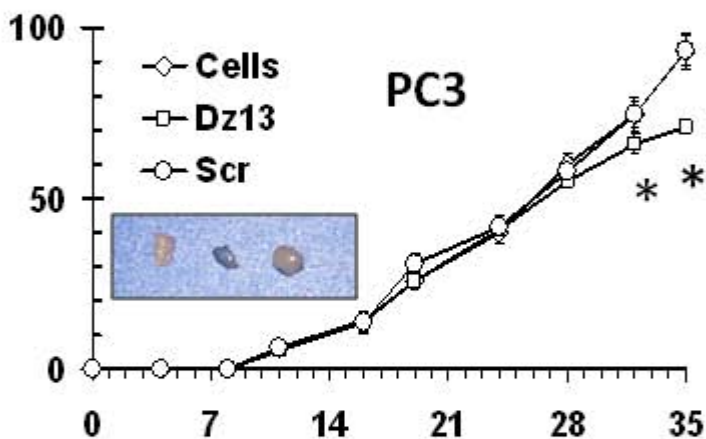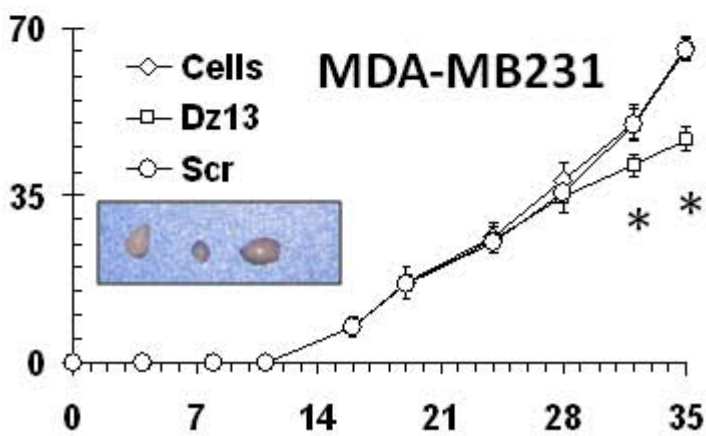

**Time (days since cell injection)**

Supplement: MOESM5 [file 9540224]
